# Supplementary material
Source: Springer Nature journal article supplement (https://www.springermedizin.de/resource/supplementary/12974_2011_350_MOESM2_ESM.pdf/9601470)

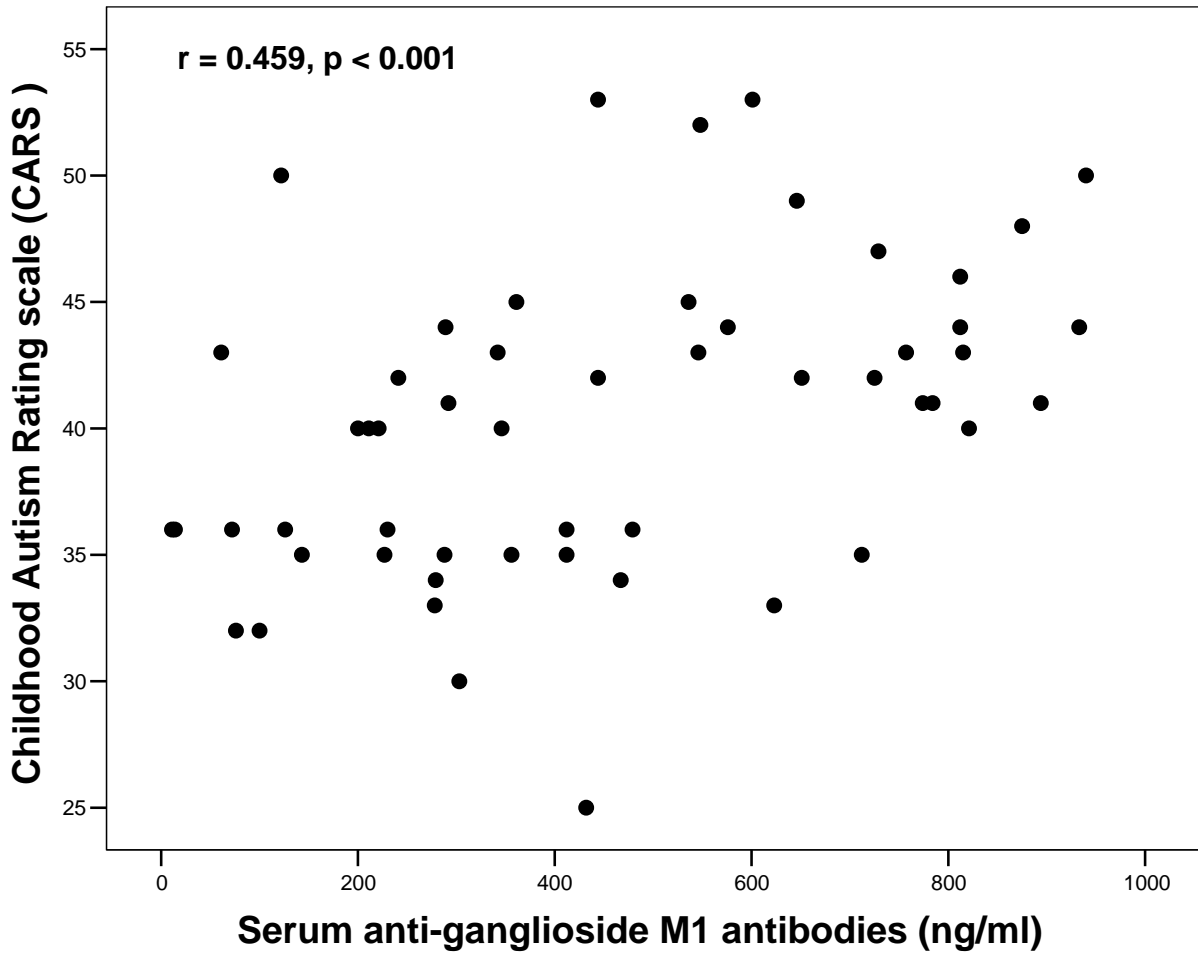

Supplement: MOESM2 [file 9601470]
